# Supplementary material for: NovelFam3000 – Uncharacterized human protein domains conserved across model organisms
Source: PubMed Central journal article supplement (PMC1440326; doi:10.1186/1471-2164-7-48), 2006-03-13

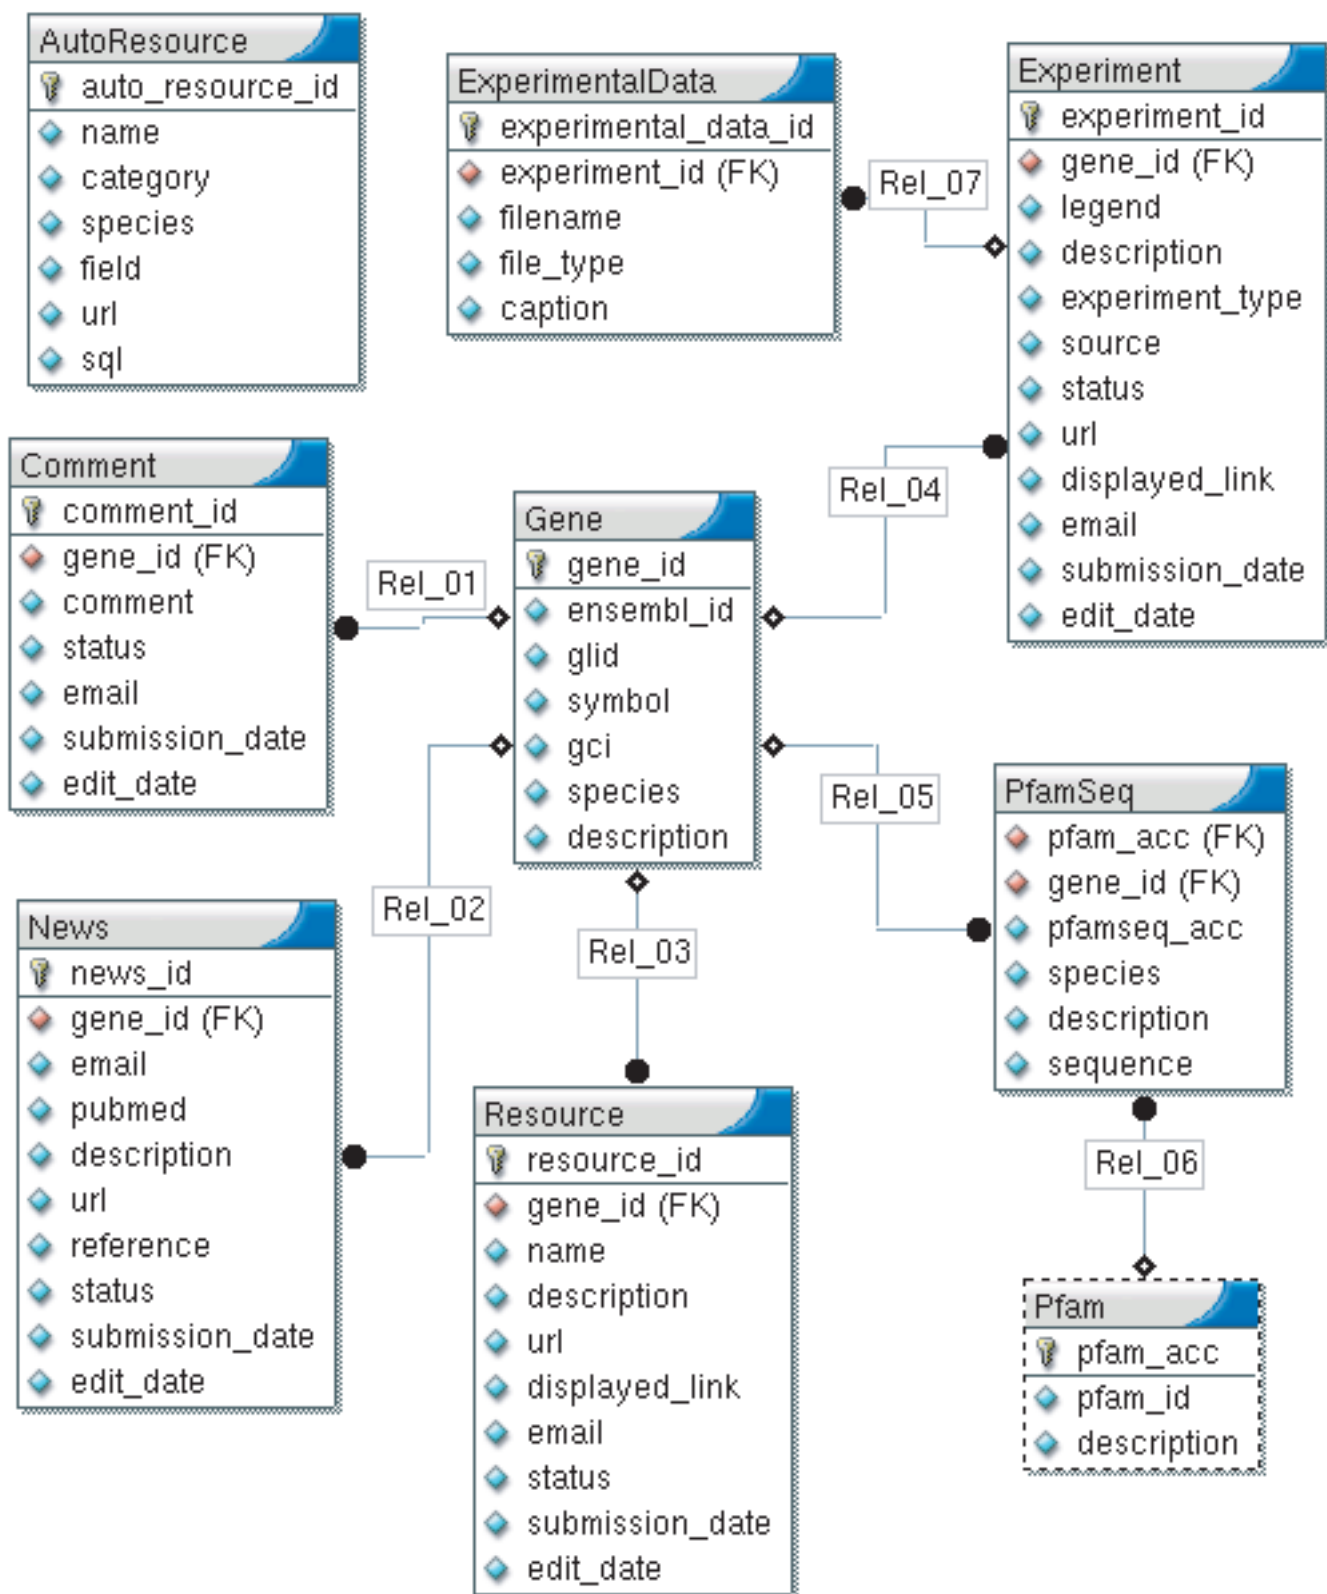

Supplement: 1471-2164-7-48-S1.pdf [file 1471-2164-7-48-S1.pdf]
